# Supplementary material for: Impact of Oligoether Side-Chain Length on the Thermoelectric Properties of a Polar Polythiophene
Source: PubMed Central journal article supplement (PMC11137803; doi:10.1021/acsaelm.3c00936), 2023-09-15
Supplement: el3c00936_si_001.pdf [file el3c00936_si_001.pdf]

## Supporting Information

### **Impact of oligoether side-chain length on the thermoelectric properties of a polar polythiophene**

Mariavittoria Craighero<sup>1</sup>, Jiali Guo<sup>2</sup>, Sepideh Zokaei<sup>1</sup>, Sophie Griggs<sup>3</sup>, Junfu Tian<sup>3</sup>, Jesika Asatryan<sup>4</sup>, Joost Kimpel<sup>1</sup>, Renee Kroon,<sup>5</sup> Kai Xu<sup>2</sup>, Juan Sebastian Reparaz<sup>2</sup>, Jaime Martín<sup>4,6</sup>, Iain McCulloch<sup>3</sup>, Mariano Campoy-Quiles<sup>2</sup>, Christian Müller<sup>1\*</sup>

<sup>1</sup>Department of Chemistry and Chemical Engineering, Chalmers University of Technology, Goteborg 41296, Sweden

\*e-mail: christian.muller@chalmers.se

<sup>2</sup>Materials Science Institute of Barcelona, ICMAB-CSIC, Campus UAB, 08193 Bellaterra, Spain

<sup>3</sup>Department of Chemistry, University of Oxford, Chemistry Research Laboratory, 12 Mansfield Road, Oxford OX1 3TA, United Kingdom

<sup>4</sup>Universidade da Coruña, Campus Industrial de Ferrol, CITENI, Esteiro, 15403, Ferrol, Spain

<sup>5</sup>Laboratory of Organic Electronics, Linköping University, 60174, Norrköping, Sweden

<sup>6</sup>POLYMAT, Paseo Manuel de Lardizabal 3, 20018, Donostia-San Sebastián, Spain

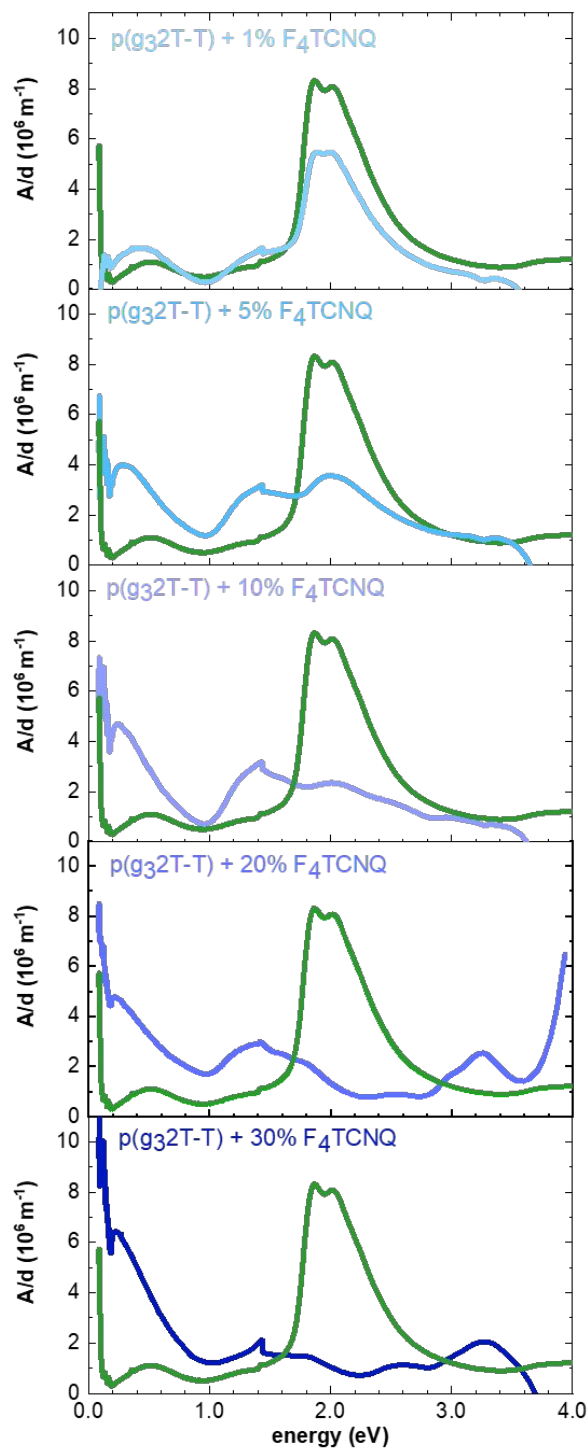

**Figure S1.** UV-vis absorbance spectra, with the absorbance  $A$  normalized by the film thickness  $d$ , of p(g<sub>3</sub>2T-T) before (green) and after co-processing with 1 mol%, 5 mol%, 10 mol%, 20 mol% and 30 mol% F<sub>4</sub>TCNQ (blue).

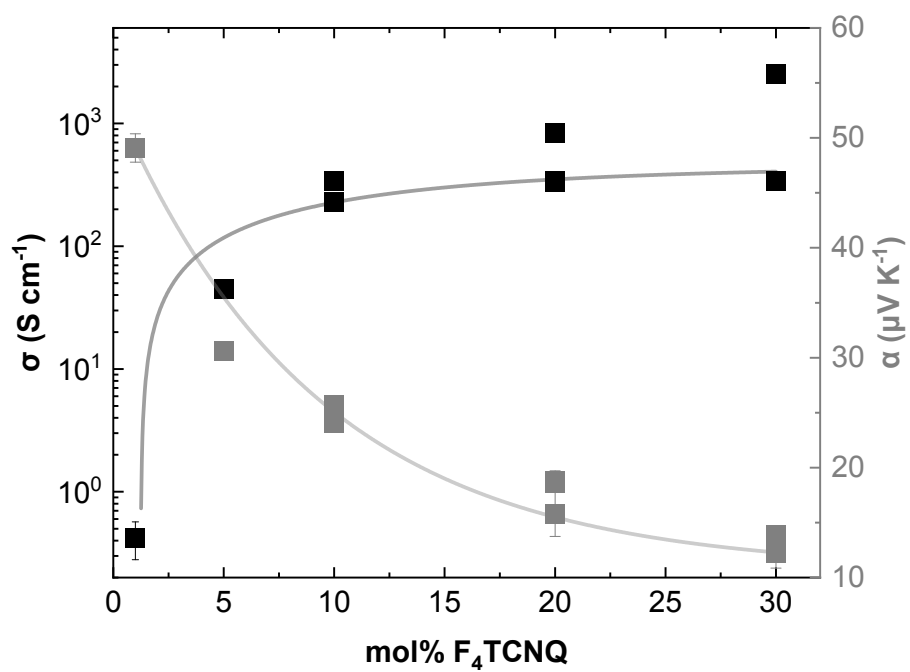

**Figure S2.** Thermoelectric properties of p(g<sub>3</sub>2T-T) co-processed with 1, 5, 10, 20 and 30 mol% F<sub>4</sub>TCNQ.

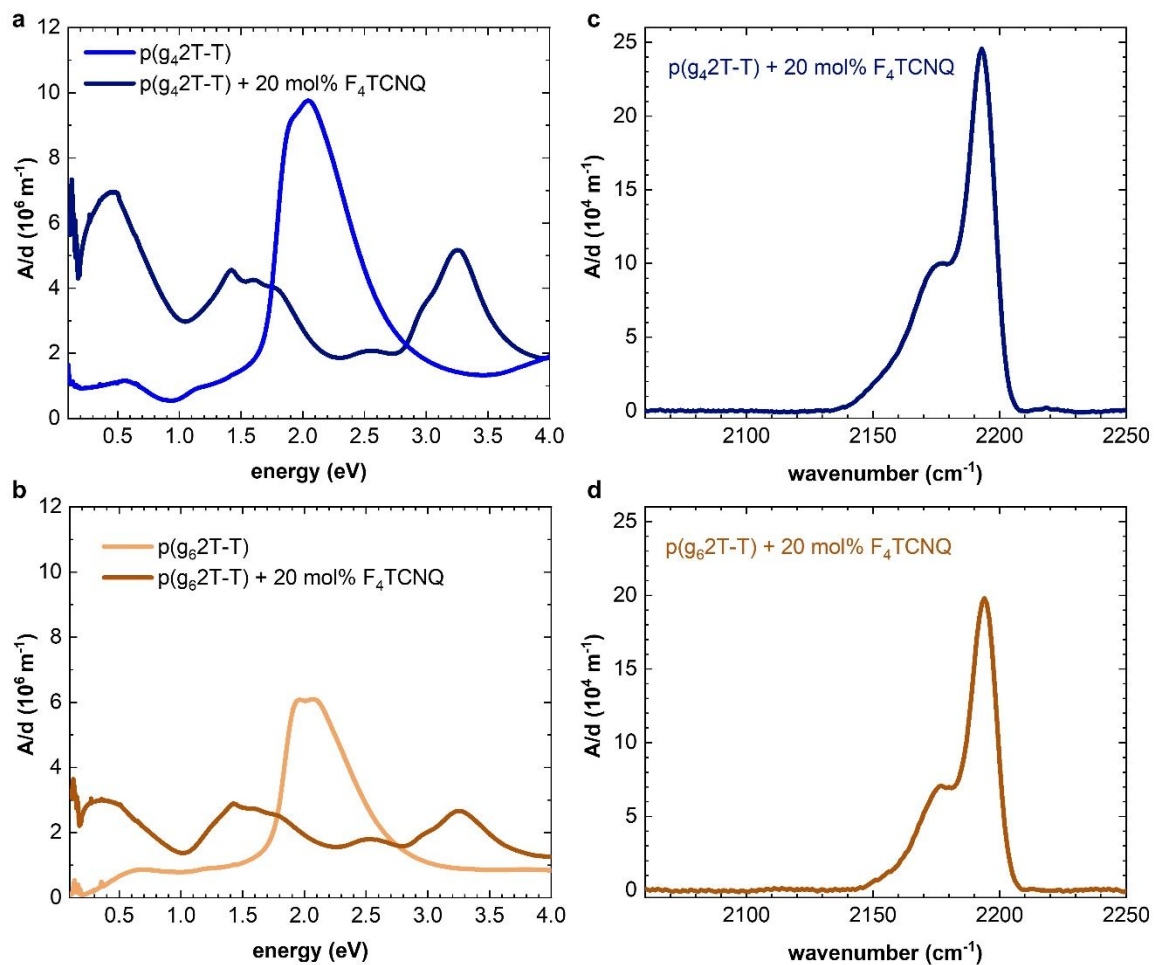

**Figure S3.** UV-vis (a,b) and transmission FTIR (c,d) absorbance spectra, with the absorbance  $A$  normalized by the film thickness  $d$ , of  $p(g_x2T-T)$  before (light color) and after co-processing with 20 mol%  $F_4TCNQ$  (dark color).

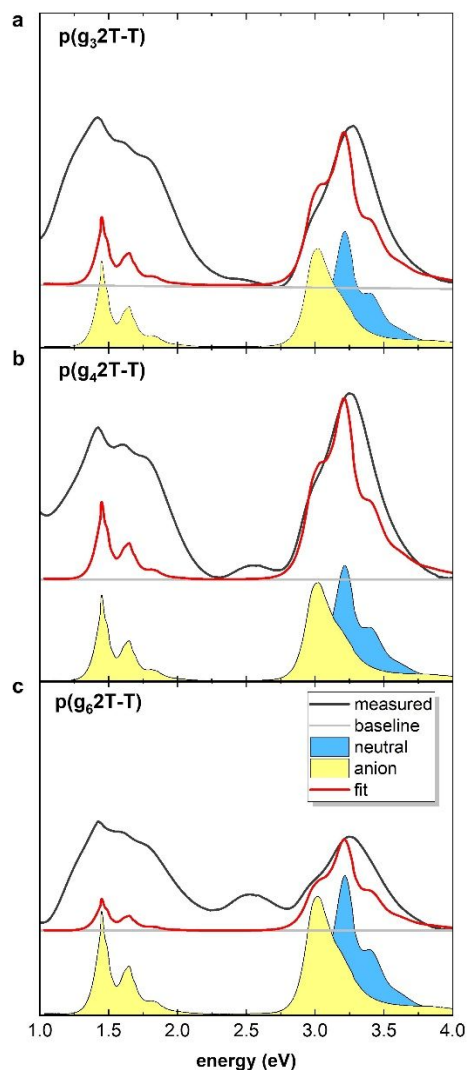

**Figure S4.** UV-vis spectra of p(g<sub>3</sub>2T-T) (a), p(g<sub>4</sub>2T-T) (b) and p(g<sub>6</sub>2T-T) (c) films co-processed with 20 mol% F<sub>4</sub>TCNQ (dark grey), of neutral F<sub>4</sub>TCNQ and its anion in acetonitrile from Kiefer et al., Nature Mater. 2019, 18, 149-155 (blue and yellow filled curves) and fit of the measured spectra in the UV region composed of the spectra of neutral F<sub>4</sub>TCNQ and its anion as well as a vertical offset (red). The experimental spectra were fitted with a superposition of a horizontal baseline (grey) and the spectra of neutral F<sub>4</sub>TCNQ and its anion (blue and yellow). The ratio of ionized and neutral dopant molecules  $f$  was calculated by comparing the contributions of their respective UV-vis spectra to the fit.

### Calculation of number of charge carriers (polarons) per unit volume

The number of charge carriers (polarons)  $N_p^{UVvis}$  per unit volume was estimated according to:

$$N_p^{UVvis} = \eta_{ion} \cdot x_d \left( \frac{M_{g_x2T-T}}{3 \cdot \rho_{p(g_x2T-T)}} (100 - x_d) + \frac{M_{F_4TCNQ}}{\rho_{F_4TCNQ}} x_d \right)^{-1} \quad (S1)$$

where  $x_d$  is the dopant molar concentration (i.e. 20 mol% F<sub>4</sub>TCNQ),  $\rho_{p(g_x2T-T)} = 1 \text{ g cm}^{-3}$  and  $\rho_{F_4TCNQ} = 1.6 \text{ g cm}^{-3}$  are the assumed density of p(g<sub>x</sub>2T-T) and F<sub>4</sub>TCNQ, and  $M_{g_x2T-T} = 570, 659$  or  $835 \text{ g mol}^{-1}$  and  $M_{F_4TCNQ} = 276 \text{ g mol}^{-1}$  are the molecular weight of the g<sub>x</sub>2T-T repeat unit and F<sub>4</sub>TCNQ.

**Table S1.** Electrical properties of thin films co-processed with 20 mol% F<sub>4</sub>TCNQ per thiophene ring: polymer, number of polarons  $N_p^{FTIR}$  per unit volume (estimated error of 30% from the thickness measurement and the applied fitting procedure) and ionization efficiency  $\eta_{ion}^{FTIR}$  from analysis of FTIR spectra, electrical conductivity  $\sigma$  (error represents the standard deviation of five measurements on the same sample), charge mobility  $\mu$ .

| polymer                | $N_p^{FTIR}$<br>( $10^{26} \text{ m}^{-3}$ ) | $\eta_{ion}^{FTIR}$<br>(%) | $\sigma$<br>( $\text{S cm}^{-1}$ ) | $\mu$<br>( $\text{cm}^2 \text{ V}^{-1} \text{ s}^{-1}$ ) |
|------------------------|----------------------------------------------|----------------------------|------------------------------------|----------------------------------------------------------|
| p(g <sub>3</sub> 2T-T) | $2.2 \pm 0.7$                                | $31 \pm 9$                 | $830 \pm 15$                       | $23.9 \pm 7.2$                                           |
| p(g <sub>4</sub> 2T-T) | $4.2 \pm 1.3$                                | $60 \pm 18$                | $56 \pm 3$                         | $0.8 \pm 0.3$                                            |
| p(g <sub>6</sub> 2T-T) | $3.3 \pm 1.0$                                | $47 \pm 14$                | $51 \pm 4$                         | $1.0 \pm 0.3$                                            |

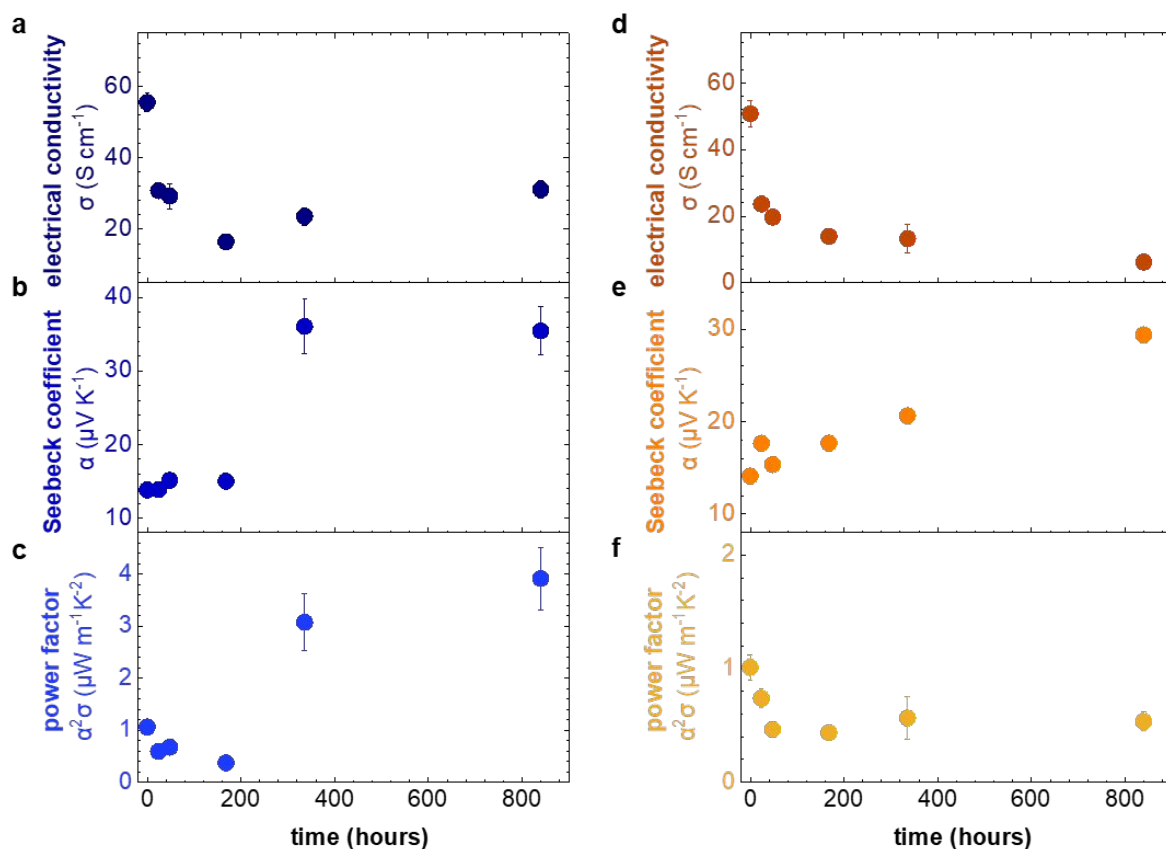

**Figure S5.** Electrical conductivity (a,d), Seebeck coefficient (b,e) and power factor (c,f) vs aging time of p(g<sub>4</sub>2T-T) and p(g<sub>6</sub>2T-T) co-processed with 20 mol% of F<sub>4</sub>TCNQ as-cast and aged at ambient conditions.

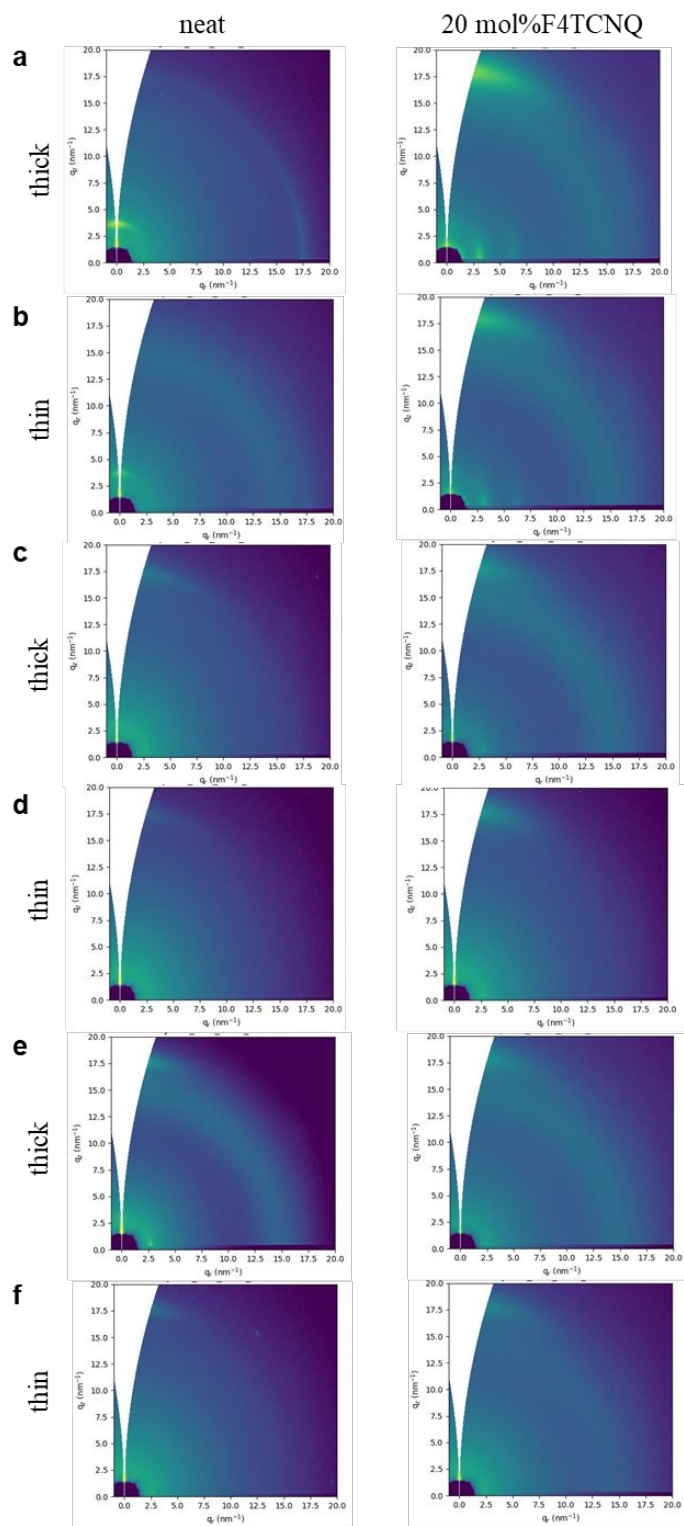

**Figure S6.** GIWAXS patterns of p(g<sub>2</sub>T-T) (a,b), p(g<sub>4</sub>2T-T) (c,d) and p(g<sub>6</sub>2T-T) (e,f) neat and co-processed with 20 mol% F<sub>4</sub>TCNQ.



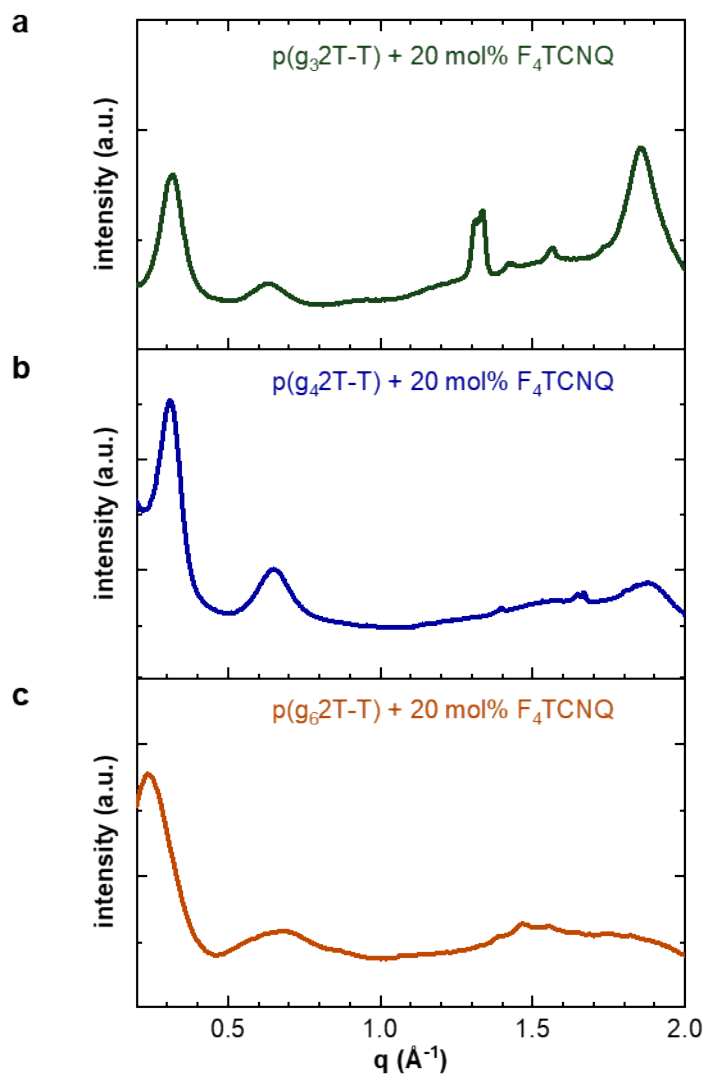

**Figure S7.** Transmission WAXS diffractograms of (a) p(g<sub>3</sub>2T-T), (b) p(g<sub>4</sub>2T-T) and (c) p(g<sub>6</sub>2T-T) (c) co-processed with 20 mol% F<sub>4</sub>TCNQ. The additional peaks between 1.3 and 1.6  $\text{\AA}^{-1}$  likely arise because of the presence of excess F<sub>4</sub>TCNQ.

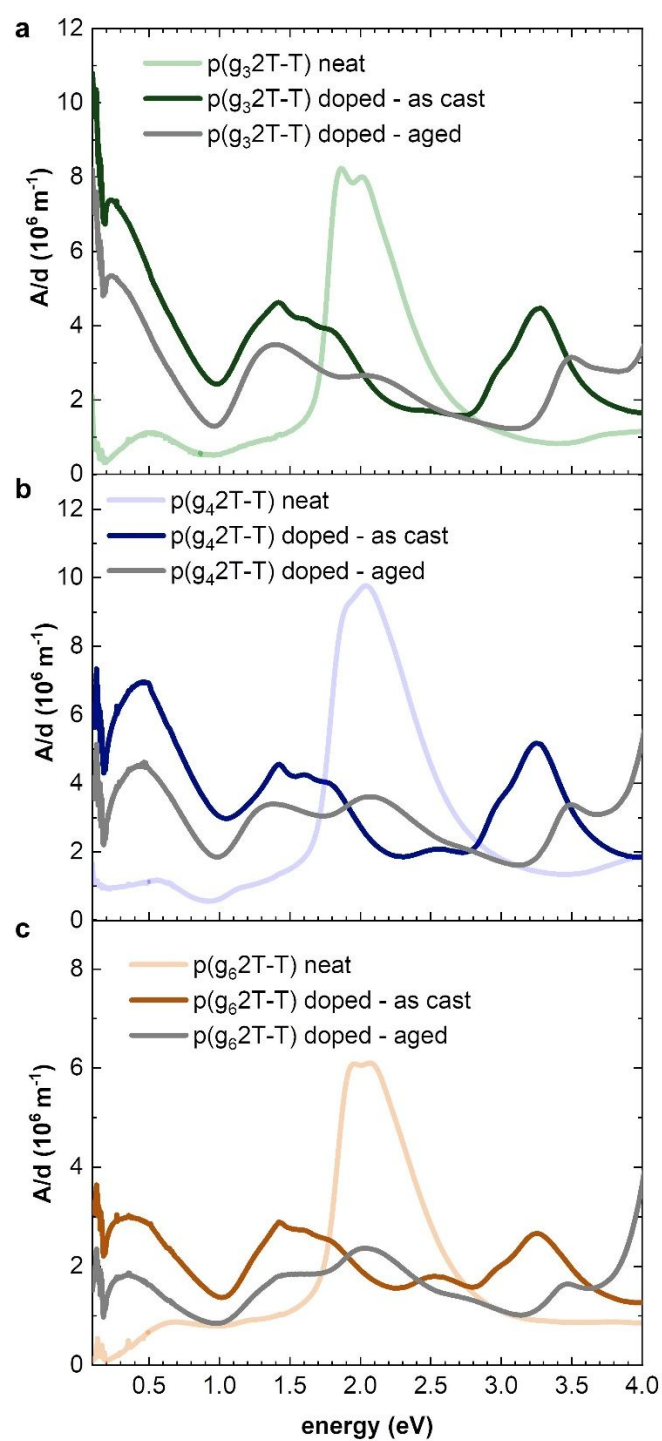

**Figure S8.** UV-vis and transmission FTIR absorbance spectra, with the absorbance  $A$  normalized by the film thickness  $d$ , of  $p(g_32T-T)$  (a),  $p(g_42T-T)$  (b) and  $p(g_62T-T)$  (c) neat and doped with 20 mol%  $F_4TCNQ$  samples as-cast and aged at ambient conditions for 3 months.

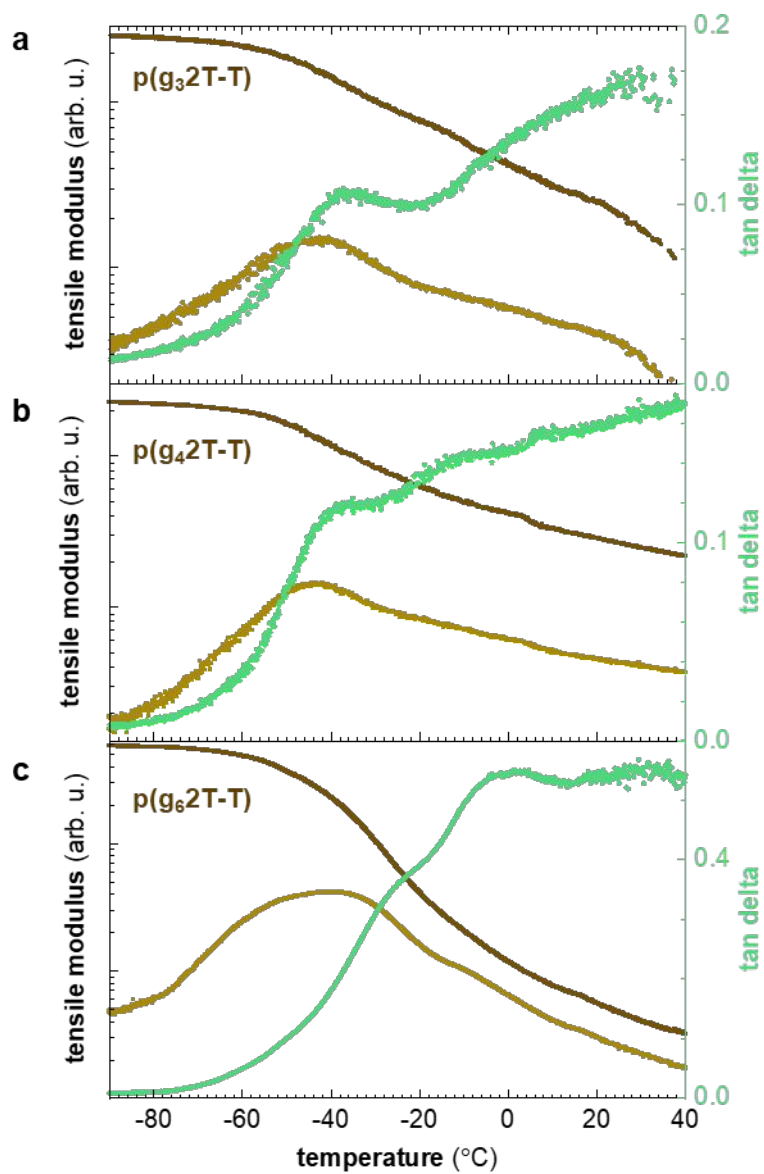

**Figure S9.** Tensile storage (dark brown) and loss (light brown) modulus,  $E'$  and  $E''$ , and  $\tan \delta = E''/E'$  (green) of neat  $p(g_32T-T)$  (a),  $p(g_42T-T)$  (b) and  $p(g_62T-T)$  (c) recorded as a function of temperature on samples supported by a glass fiber mesh.

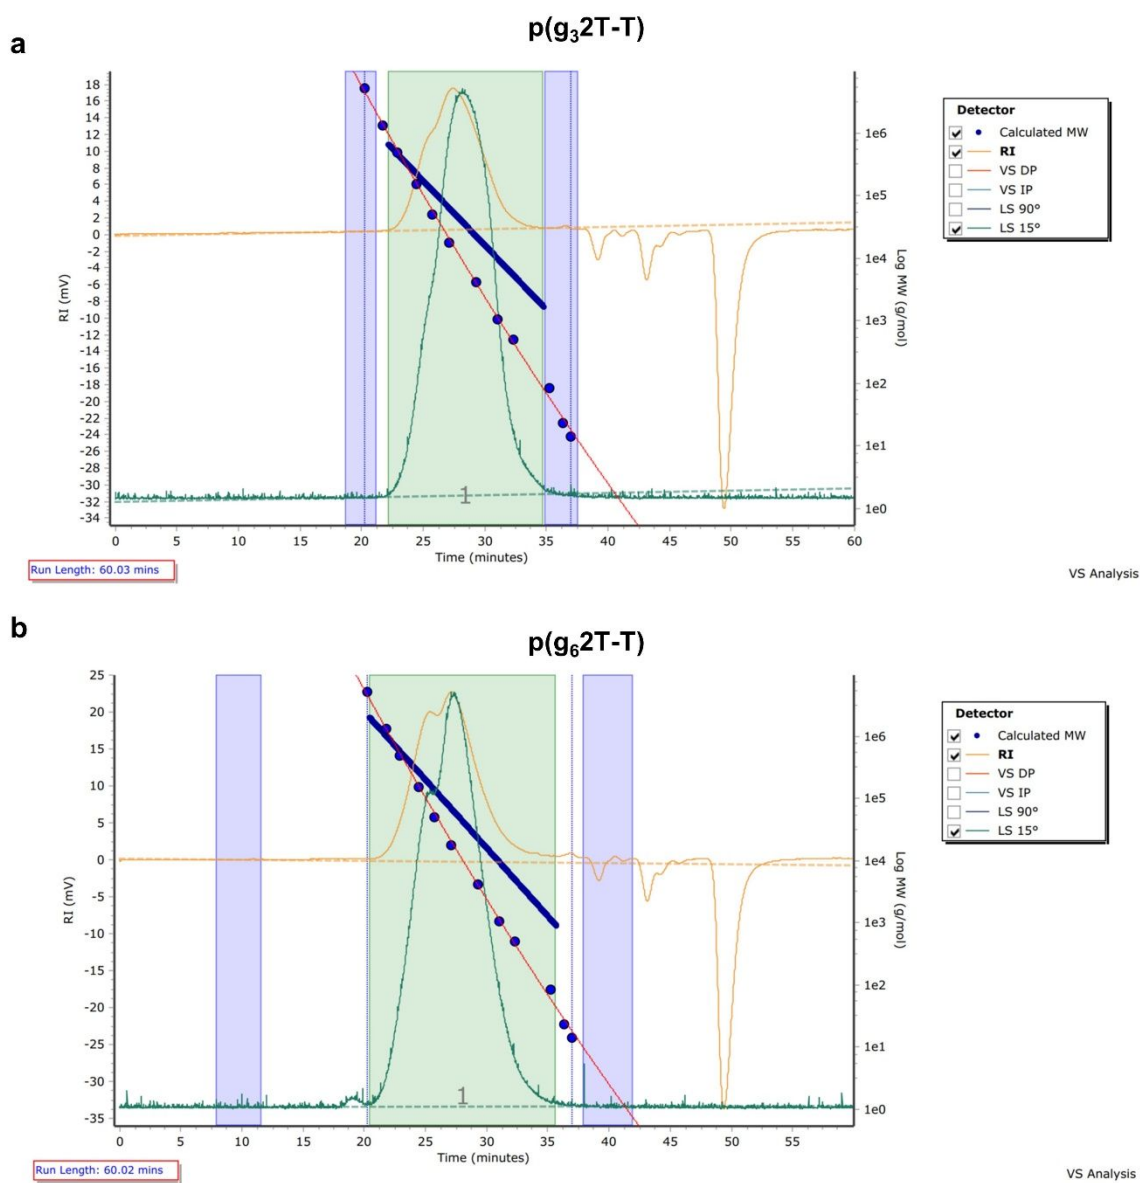

**Figure S10.** GPC traces of  $p(g_32T-T)$  (a) and  $p(g_62T-T)$  (b) at 343 K in DMF with 0.1 wt% LiBr at a polymer concentration of  $1 \text{ mg mL}^{-1}$ . Detectors showcased in traces are refractive index (orange) and light scattering (green).
